# Supplementary material for: Characterization of Rotavirus Strains Responsible for Breakthrough Diarrheal Diseases among Zambian Children Using Whole Genome Sequencing
Source: MDPI journal article supplement (doi:10.3390/vaccines11121759), 2023-11-26
Supplement: s1 [file s1]

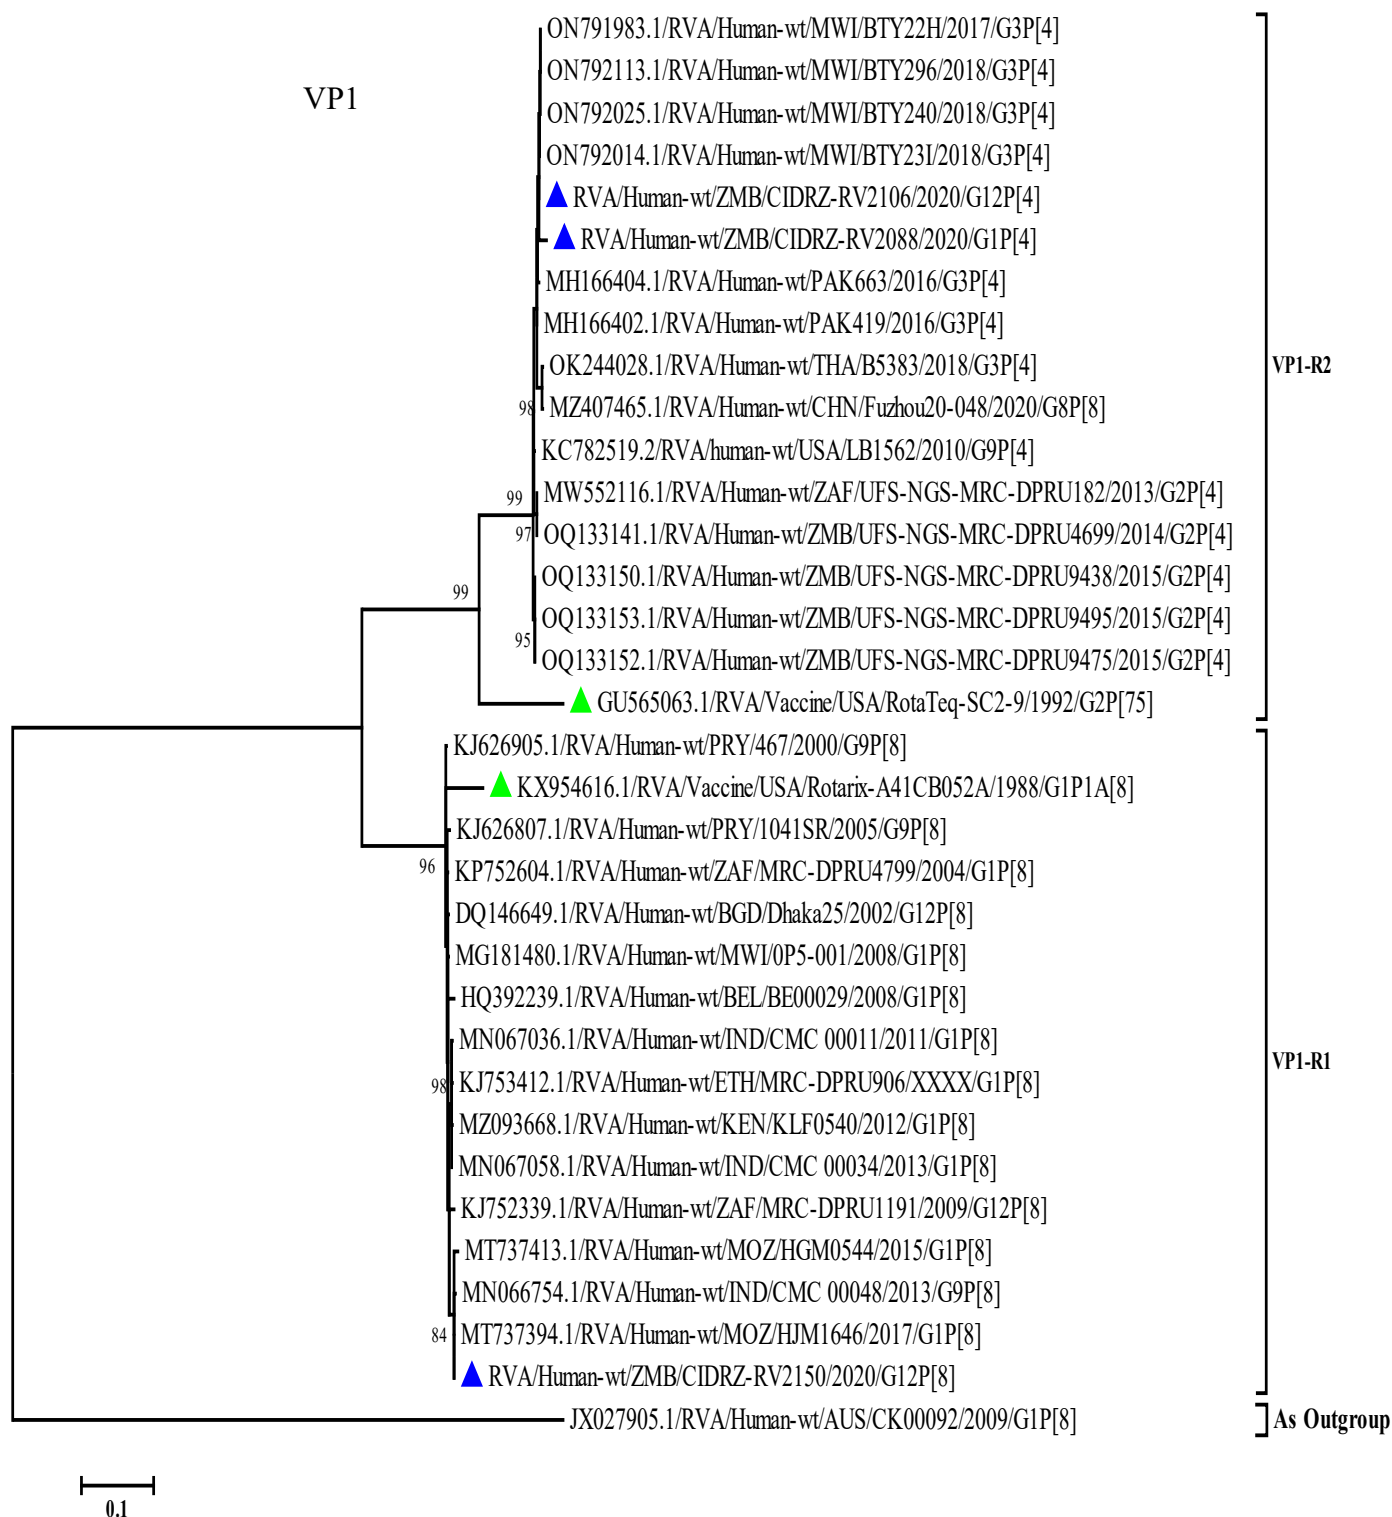

**Figure S1**

Maximum likelihood phylogenetic tree between the VP1 gene of the Zambian strains as well as global strains. Green filled triangles represented vaccine sequences whereas Zambian strains Blue filled triangles. Scale at the bottom indicates nucleotide substitutions per site whereas bootstrap values greater than or equal to 70 were shown on the branch nodes



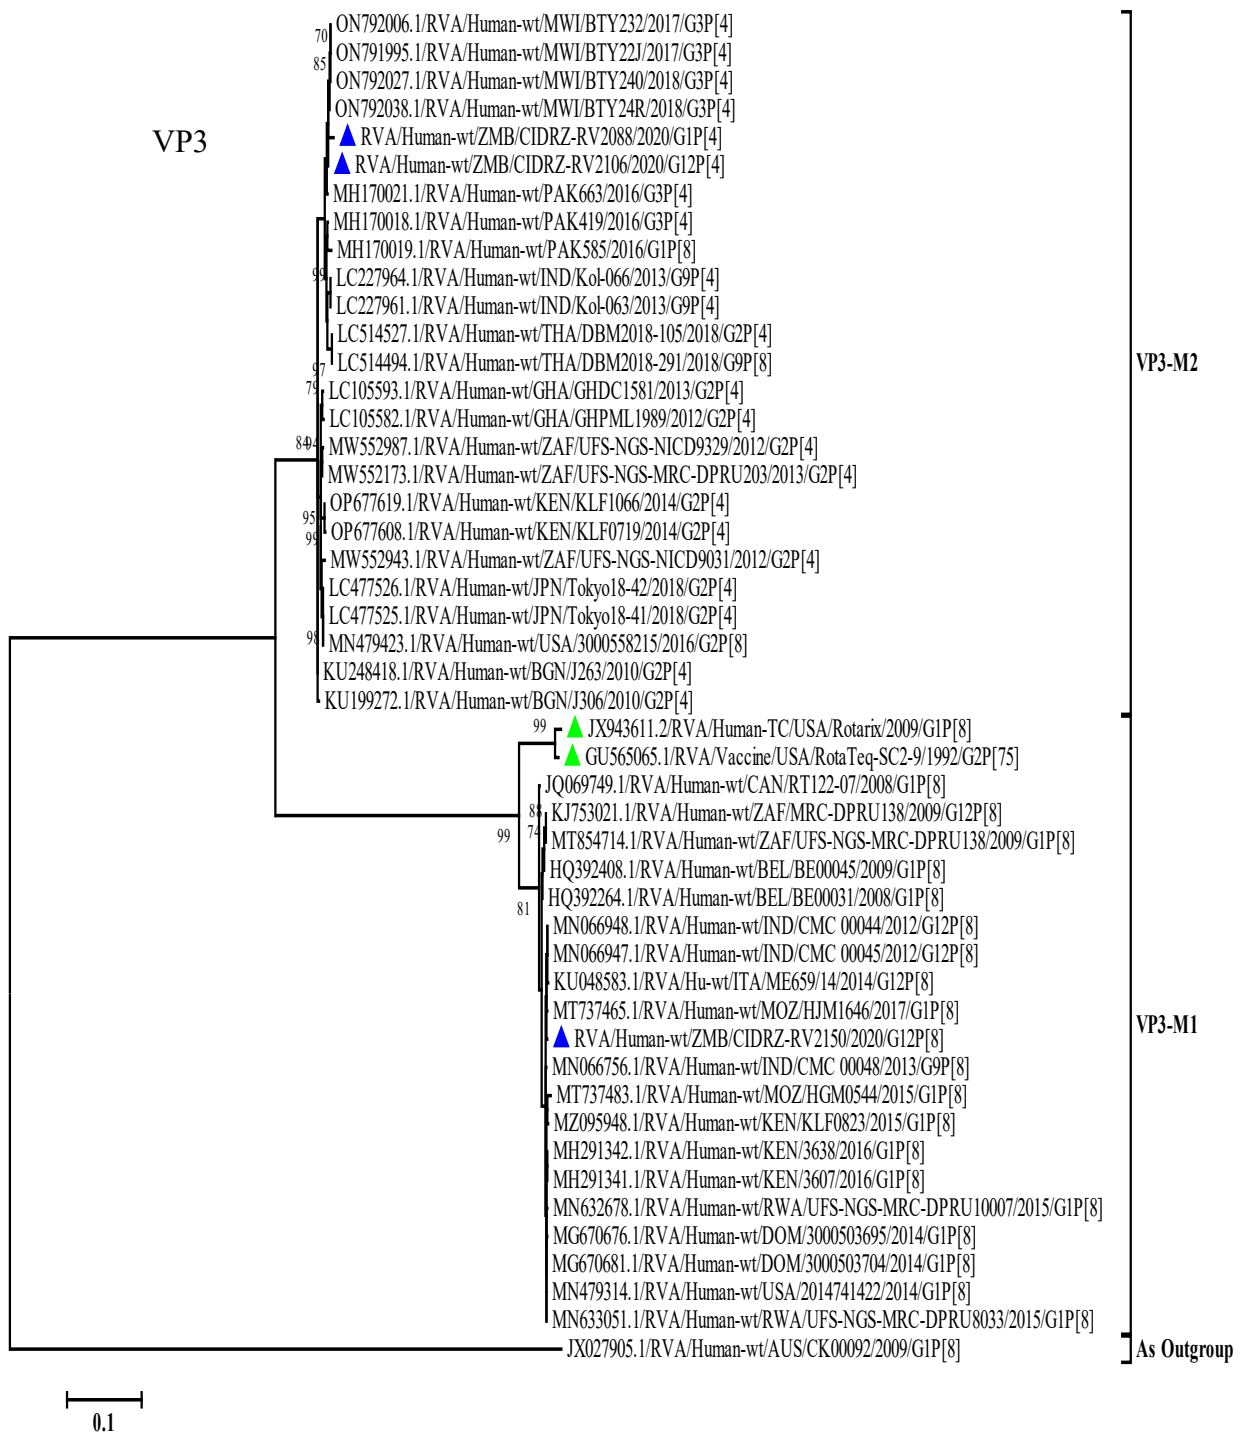

**Figure S3**

Maximum likelihood phylogenetic tree between the VP3 gene of the Zambian strains as well as global strains. Green filled triangles represent vaccine sequences whereas Zambian strains Blue filled triangles. Scale at the bottom indicates nucleotide substitutions per site whereas bootstrap values greater than or equal to 70 were shown on the branch nodes

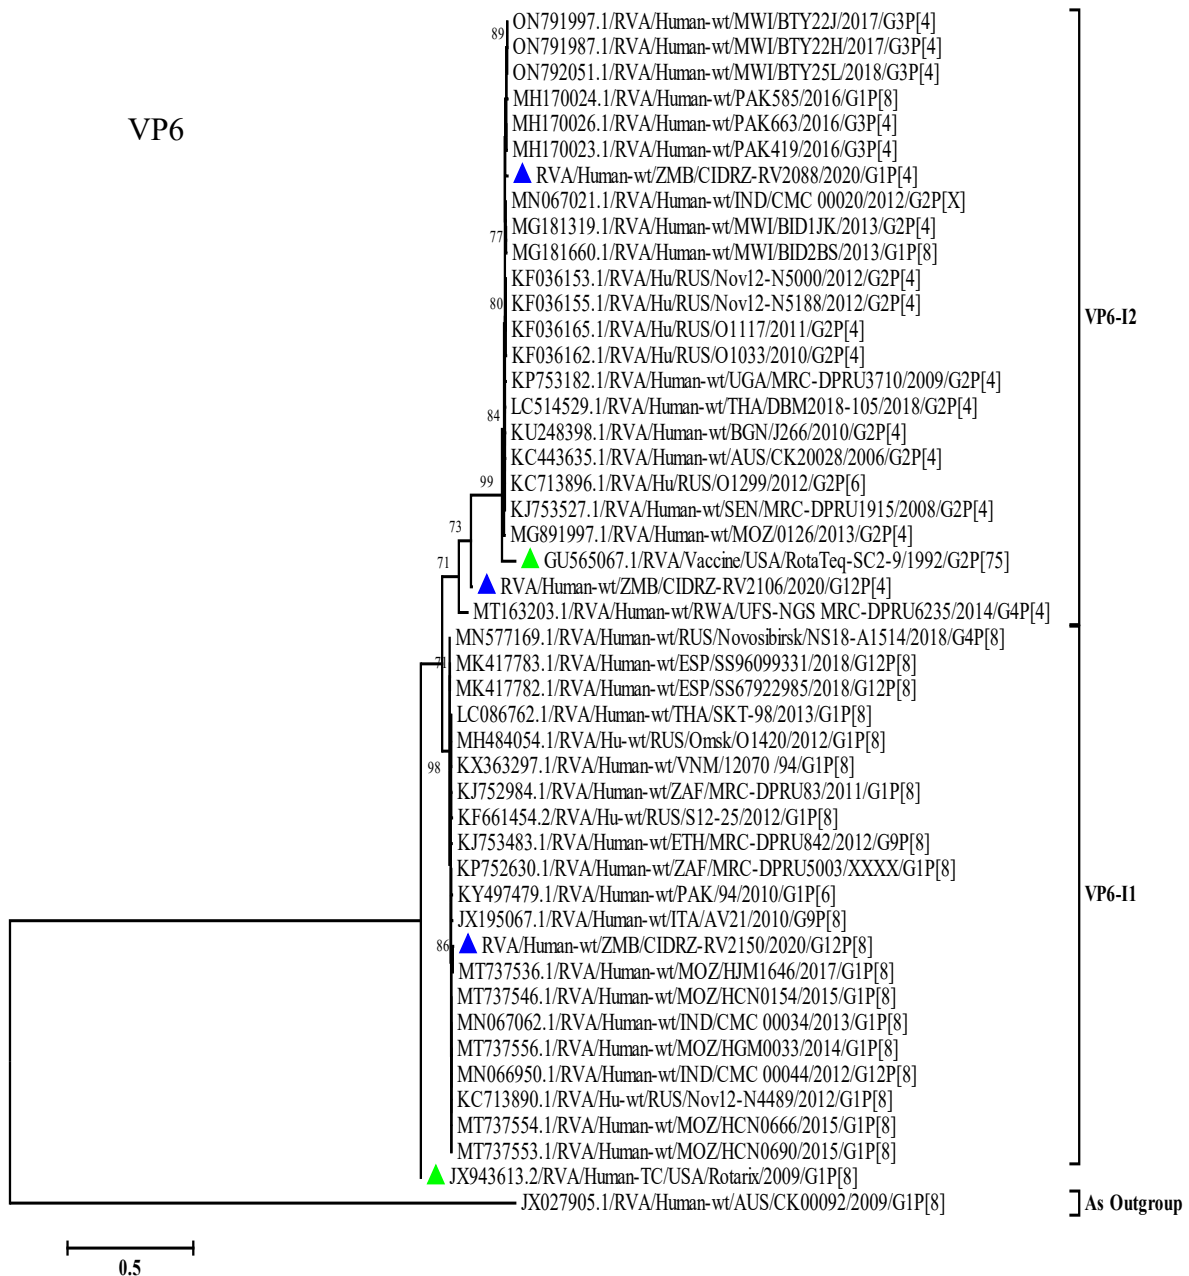

**Figure S4**

Maximum likelihood phylogenetic tree between the VP6 gene of the Zambian strains as well as global strains. Green filled triangles represent vaccine sequences whereas Zambian strains Blue filled triangles. Scale at the bottom indicates nucleotide substitutions per site whereas bootstrap values greater than or equal to 70 were shown on the branch nodes

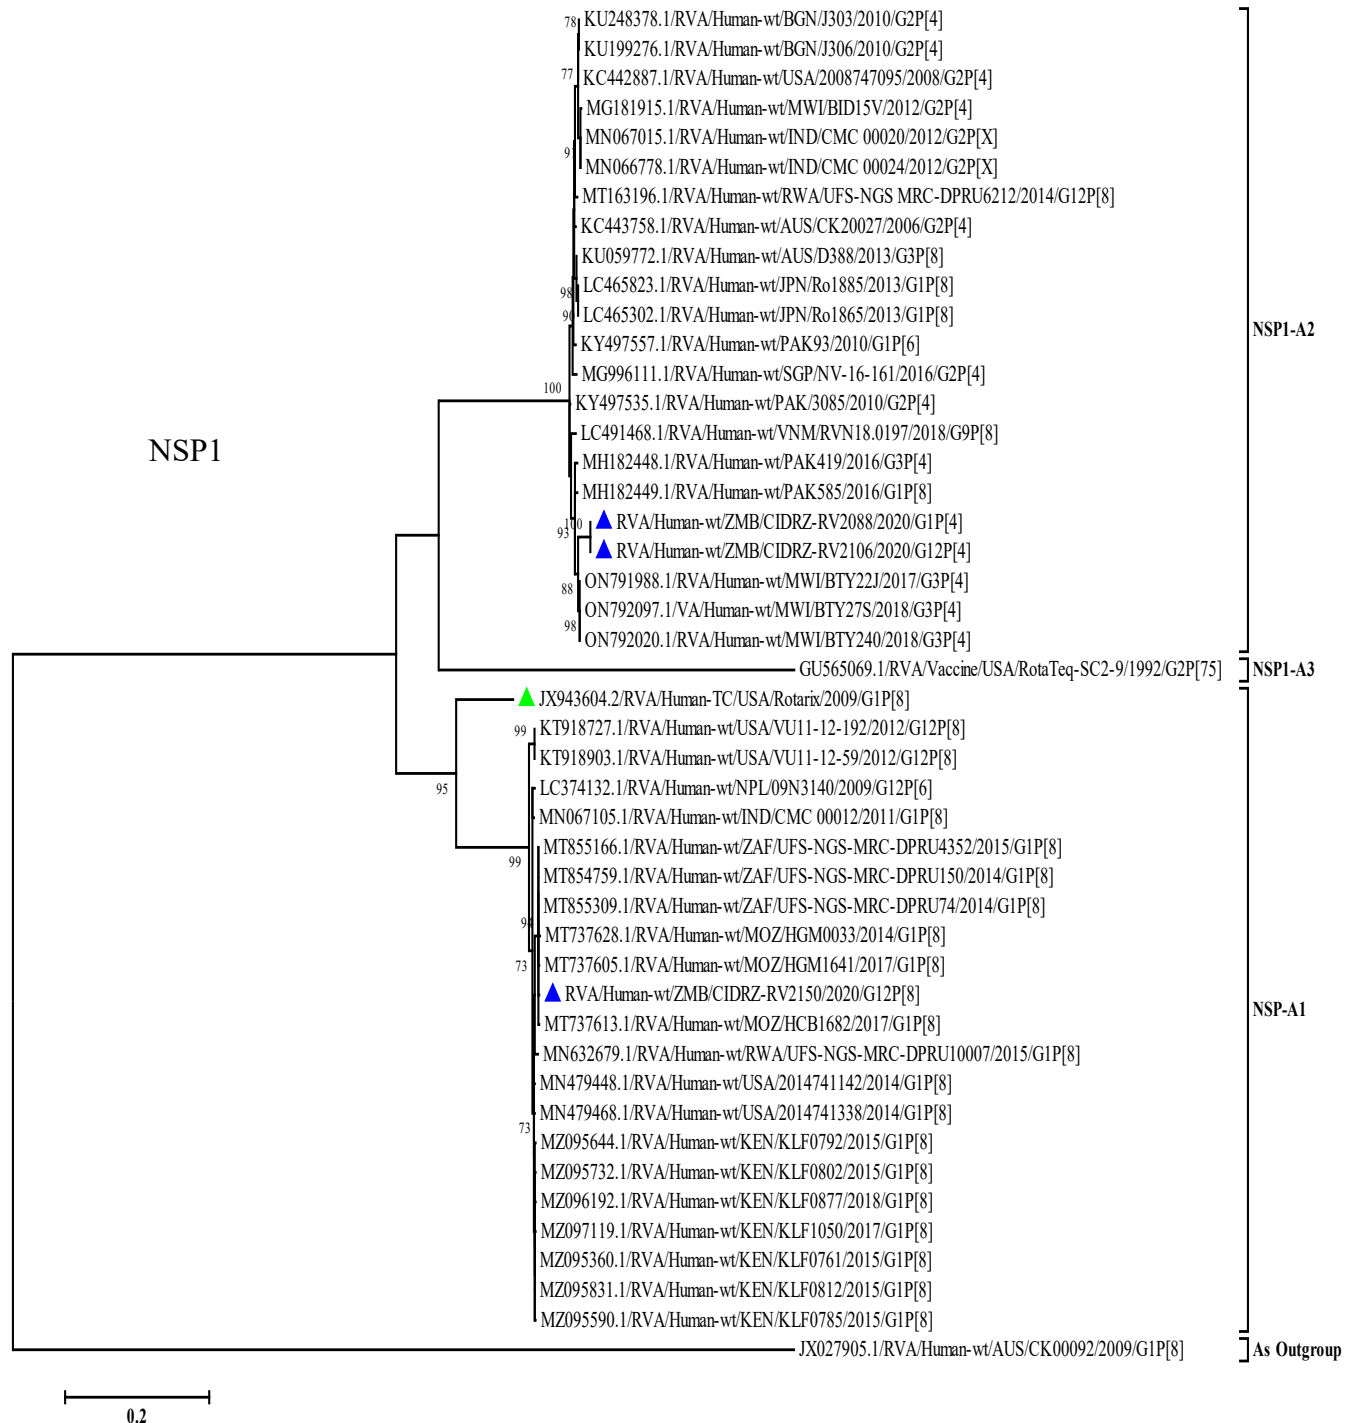

**Figure S5**

Maximum likelihood phylogenetic tree between the NSP1 gene of the Zambian strains as well as global strains. Green filled triangles represent vaccine sequences whereas Zambian strains Blue filled triangles. Scale at the bottom indicate nucleotide substitutions per site whereas bootstrap values greater than or equal to 70 were shown on the branch nodes

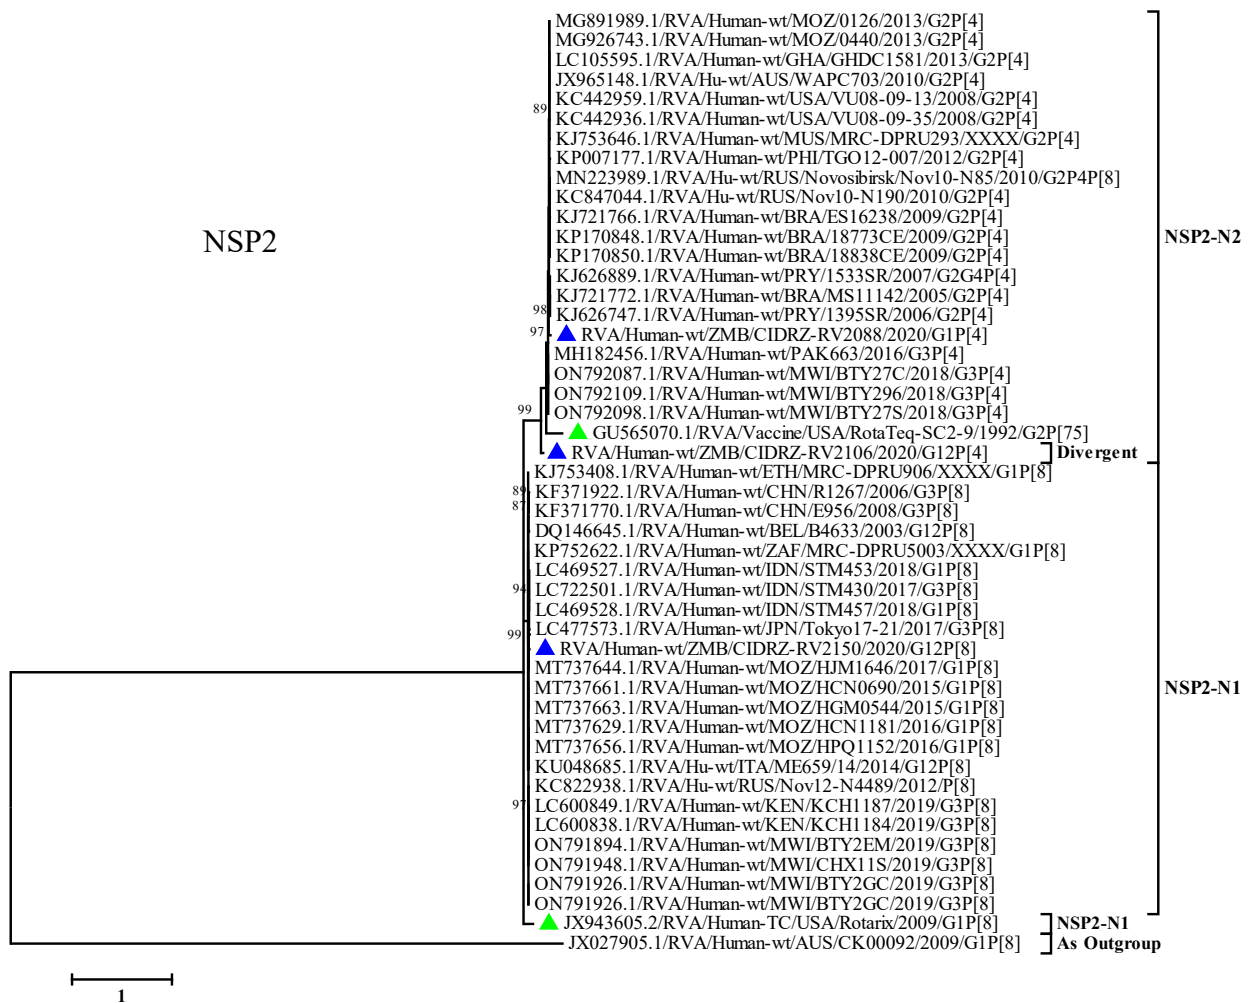

**Figure S6**

Maximum likelihood phylogenetic tree between the NSP2 gene of the Zambian strains as well as global strains. Green filled triangles represent vaccine sequences whereas Zambian strains Blue filled triangles. Scale at the bottom indicates nucleotide substitutions per site whereas bootstrap values greater than or equal to 70 were shown on the branch nodes

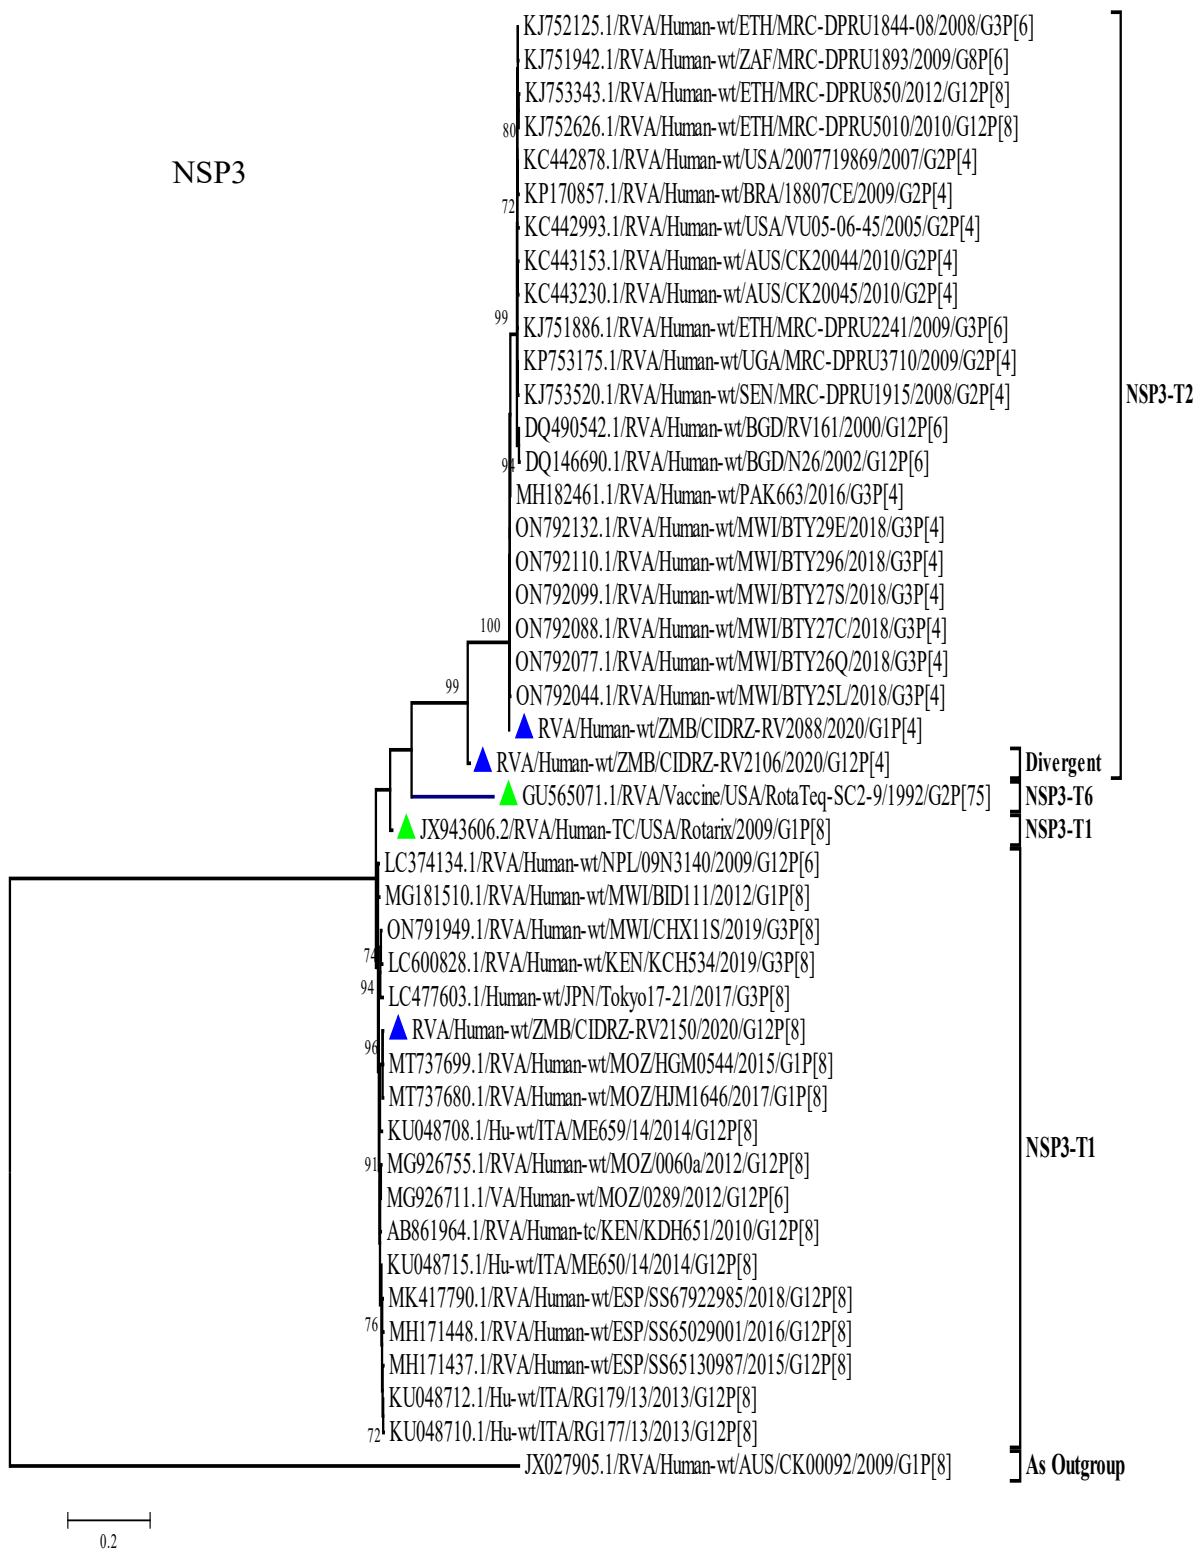

**Figure S7**

Maximum likelihood phylogenetic tree between the NSP3 gene of the Zambian strains as well as global strains. Green filled triangles represent vaccine sequences whereas Zambian strains Blue filled triangles. Scale at the bottom indicates nucleotide substitutions per site whereas bootstrap values greater than or equal to 70 were shown on the branch nodes



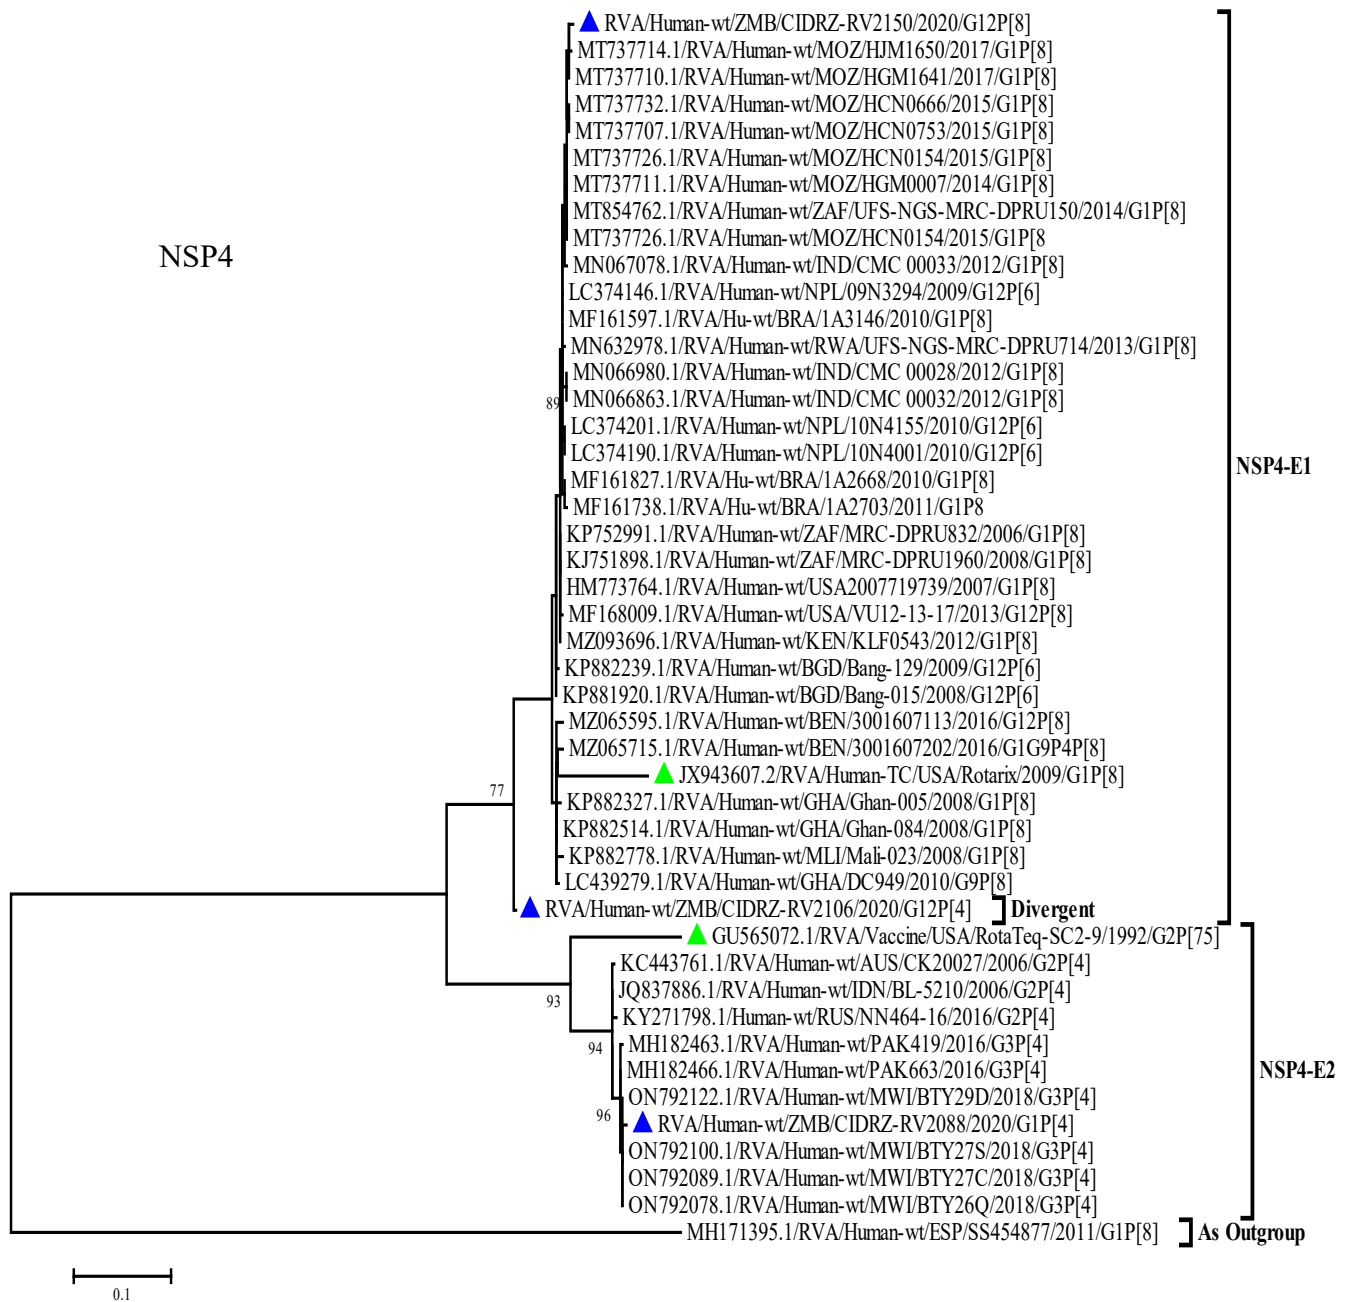

**Figure S8**

Maximum likelihood phylogenetic tree between the NSP4 gene of the Zambian strains as well as global strains. Green filled triangles represented vaccine sequences whereas Zambian strains Blue filled triangles. Scale at the bottom indicates nucleotide substitutions per site whereas bootstrap values greater than or equal to 70 were shown on the branch nodes



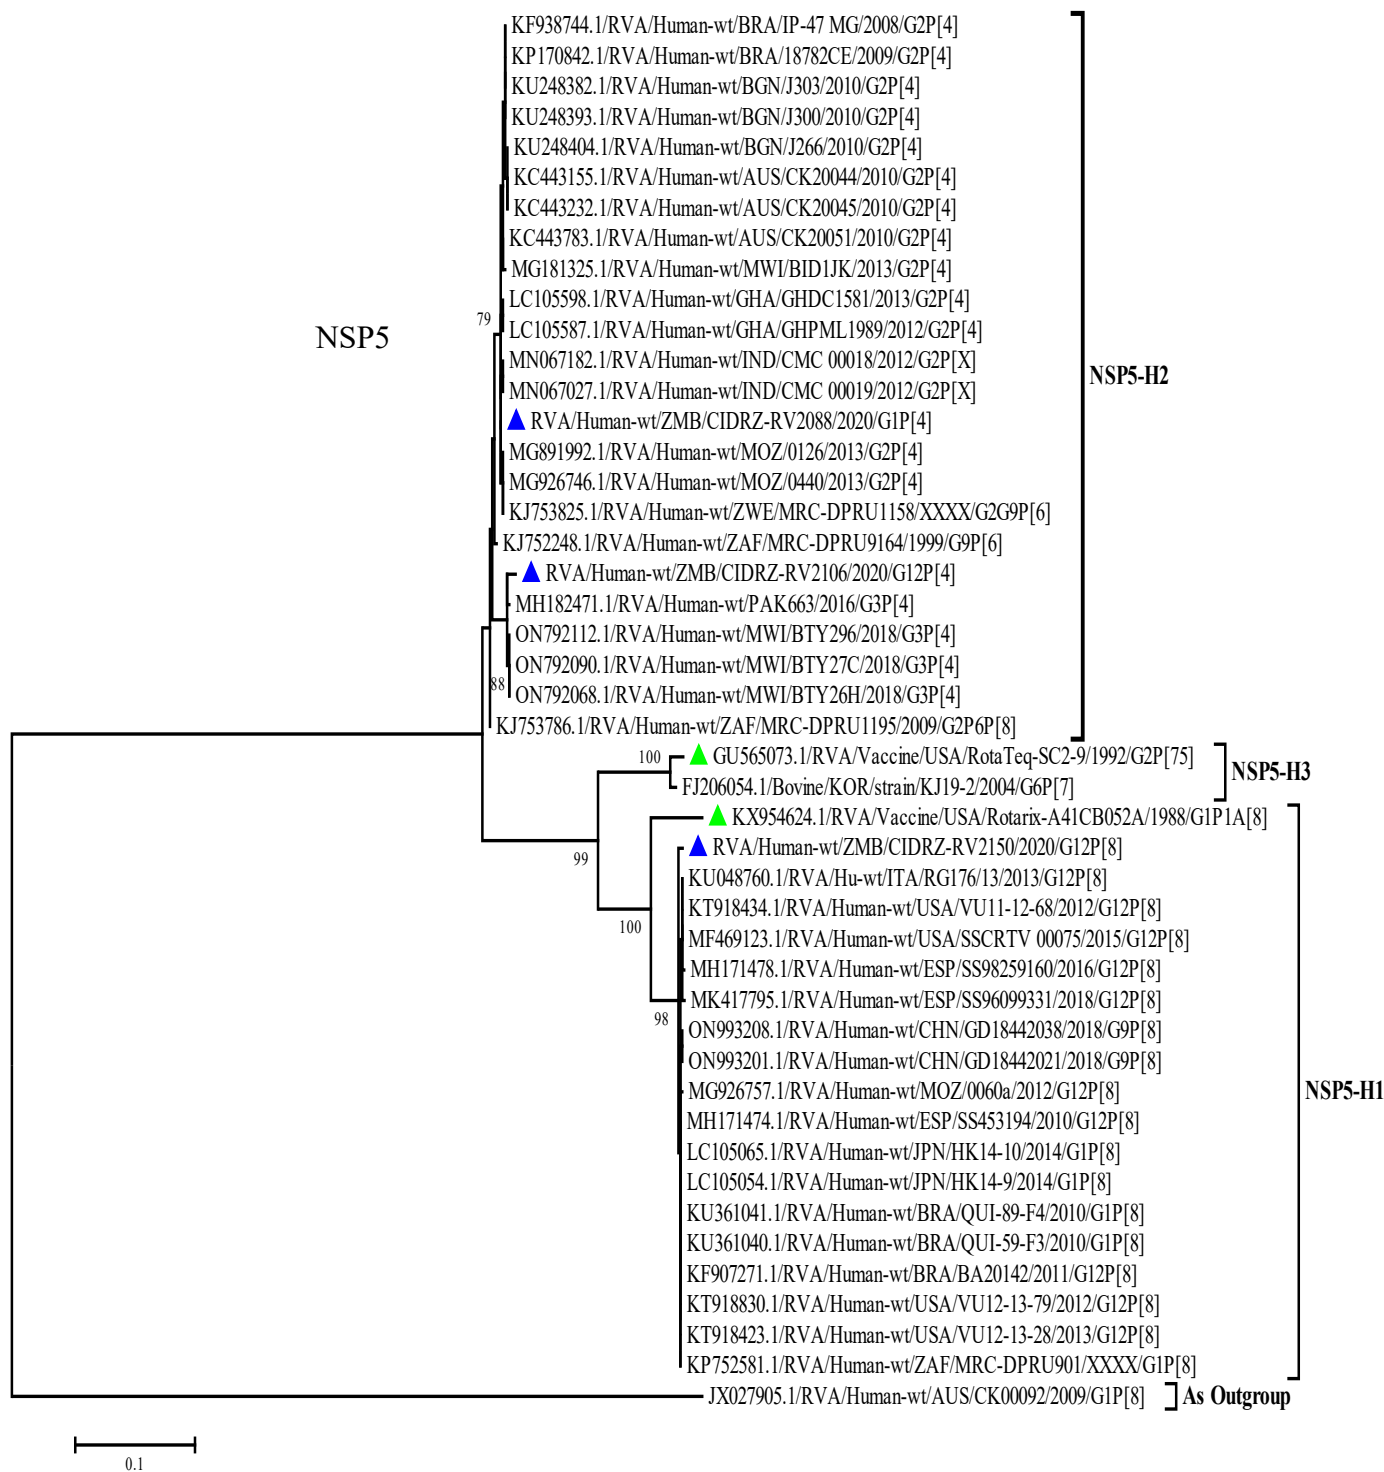

**Figure S9**

Maximum likelihood phylogenetic tree between the NSP5 gene of the Zambian strains as well as global strains. Green filled triangles represented vaccine sequences whereas Zambian strains Blue filled triangles. Scale at the bottom indicates nucleotide substitutions per site whereas bootstrap values greater than or equal to 70 were shown on the branch nodes
